# Supplementary material
Source: PubMed Central journal article supplement (PMC3932536)
Supplement: NIHMS540656-supplement-01.pdf [file NIHMS540656-supplement-01.pdf]

# THE LANCET **Neurology**

## **Supplementary webappendix**

This webappendix formed part of the original submission and has been peer reviewed.  
We post it as supplied by the authors.

Supplement to: Schretlen DJ, Varvaris M, Ho TE, et al. Regional brain volume abnormalities in Lesch-Nyhan disease and its variants: a cross-sectional study. *Lancet Neurol* 2013; published online Oct 24. [http://dx.doi.org/10.1016/S1474-4422\(13\)70238-2](http://dx.doi.org/10.1016/S1474-4422(13)70238-2).

## Regional brain volume abnormalities in Lesch-Nyhan disease and its variants: a cross-sectional study

### Supplementary Content

**Figure S1. Glass brains showing scanner effects (in neurological convention) on regional gray matter volume**

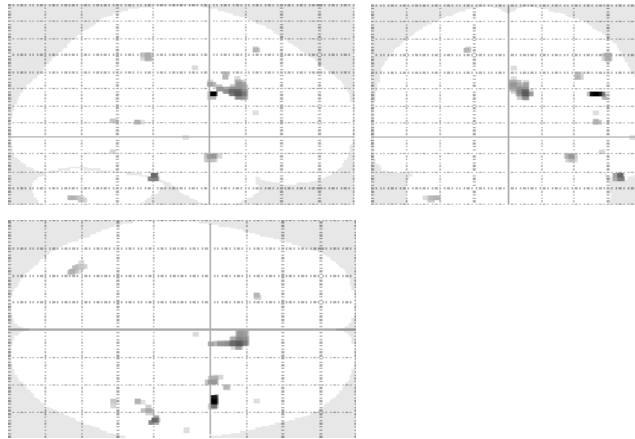

Maximum intensity projections showing regional effects of scanner on gray matter volume. Results shown illustrate an F-contrast and are not directionally specific. A liberal threshold of  $p < .001$  was employed with no minimum cluster threshold. When results were corrected at the same threshold used for effects of interest, no significant areas of increased or decreased gray matter volume were found.

**Figure S2. Glass brains showing effects of diagnosis (in neurological convention) on regional gray matter volume separately for two different machines**

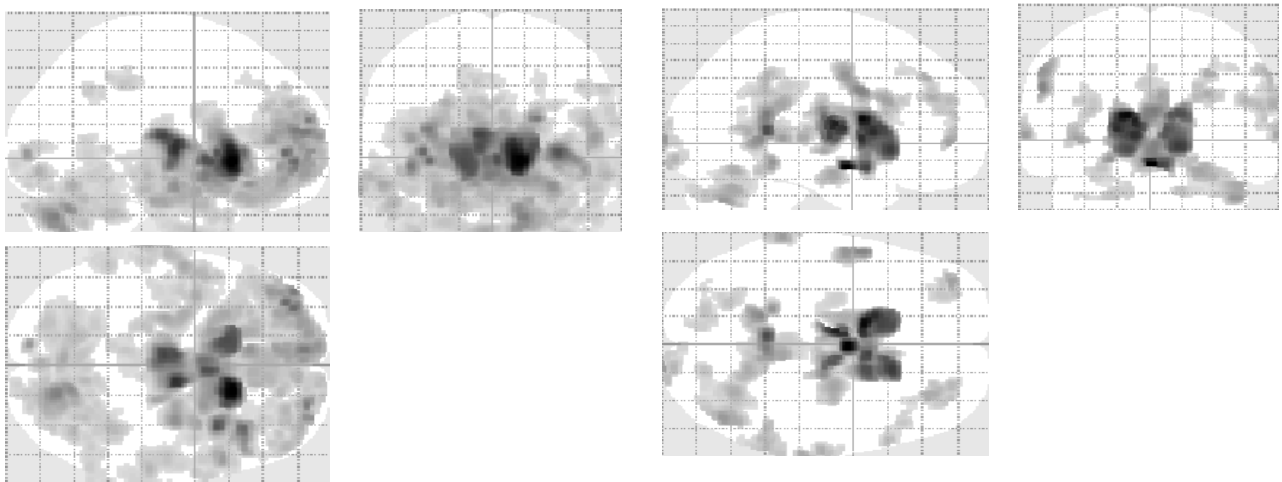

Maximum intensity projections showing results of 3x1 ANCOVA examining gray matter volume by diagnosis on a 3T scanner (left) and a 1.5T scanner (right) at  $p < .001$   $k=100$ . Note that similar findings were obtained from the two analyses, despite the fact that different participants were scanned on each machine. Based on these findings, data from both machines were pooled for analyses (covarying for machine as a nuisance variable) reported in the article.

**Figure S3. Partial correlations (controlling for age) of Burke-Fahn-Marsden (BFM) ratings of dystonia severity with total intracranial volume.**

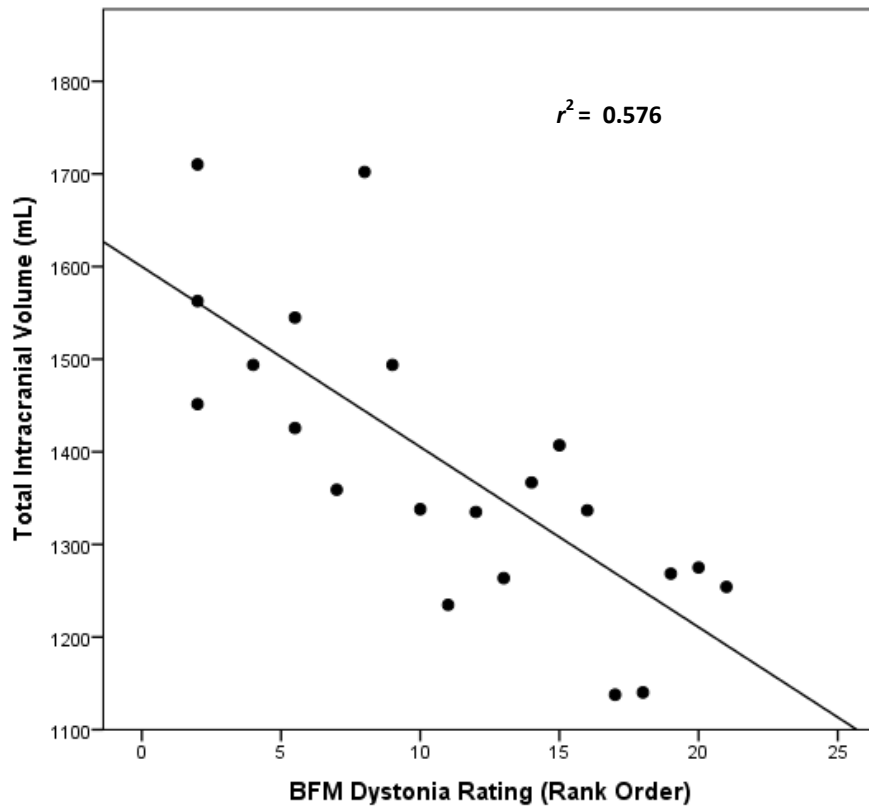

**Table S1. Gray matter volume differences by diagnosis are presented along with cluster size and peak MNI coordinates for local maxima.**

| Cluster | p (FWE-corrected) | Cluster Size | Peak MNI Coordinates |       |       |
|---------|-------------------|--------------|----------------------|-------|-------|
|         |                   |              | X                    | Y     | Z     |
| 1       | 0.001             | 10887        | -7.5                 | -12   | 4.5   |
|         |                   |              | 7.5                  | -9    | 4.5   |
|         |                   |              | 13.5                 | 19.5  | -3    |
| 2       | 0.001             | 1945         | -31.5                | 54    | 16.5  |
|         |                   |              | -33                  | 51    | 0     |
|         |                   |              | -24                  | 55.5  | -1.5  |
| 3       | 0.007             | 416          | 27                   | -10.5 | -18   |
| 4       | 0.001             | 816          | 33                   | 55.5  | 7.5   |
|         |                   |              | 40.5                 | 48    | -3    |
|         |                   |              | 28.5                 | 52.5  | 18    |
| 5       | 0.001             | 2490         | 16.5                 | -75   | -31.5 |
|         |                   |              | 22.5                 | -60   | -30   |
|         |                   |              | 28.5                 | -55.5 | -9    |
| 6       | 0.001             | 635          | -27                  | 13.5  | -16.5 |
|         |                   |              | -27                  | 21    | -9    |
|         |                   |              | -28.5                | 28.5  | -4.5  |
| 7       | 0.007             | 448          | -27                  | -7.5  | -19.5 |
|         |                   |              | -15                  | -16.5 | -25.5 |
| 8       | 0.005             | 599          | -60                  | -33   | 1.5   |
|         |                   |              | -57                  | -36   | -7.5  |
|         |                   |              | -60                  | -45   | -10.5 |
| 9       | 0.005             | 518          | 1.5                  | -37.5 | 42    |
|         |                   |              | -6                   | -37.5 | 36    |
|         |                   |              | 1.5                  | -21   | 43.5  |
